# Supplementary material for: Novel Fe2P/graphitized carbon yolk/shell octahedra for high-efficiency hydrogen production and lithium storage
Source: Royal Society of Chemistry journal article supplement (doi:10.1039/c6ta03501a), 2016-01-01
Supplement: c6ta03501a1.pdf [file c6ta03501a1.pdf]

## Supporting Information

### Novel Fe<sub>2</sub>P/graphitized carbon Yolk/shell Octahedrons for High-efficiency Hydrogen Production and Lithium Storage

Jiao Yang<sup>#</sup>, Ya Ouyang<sup>#</sup>, Huijuan Zhang, Haitao Xu, Yan Zhang, Yu Wang\*

The State Key Laboratory of Mechanical Transmissions and the School of Chemistry and Chemical Engineering, Chongqing University, 174 Shazheng Street, Shapingba District, Chongqing City 400044, PR China

<sup>#</sup>these authors contributed equally to this work.

\*E-mail: wangy@cqu.edu.cn; prospectwy@gmail.com

#### METHODS

##### Fabrication of Fe<sub>2</sub>P/GC yolk/shell octahedrons composite

First, 12 mL deionized water, 12 mL glycol, 1 mL Fe(NO<sub>3</sub>)<sub>3</sub> solution (1 M), 5 mL NaH<sub>2</sub>PO<sub>4</sub> solution (1 M) and 4 mL Na<sub>2</sub>CO<sub>3</sub> solution (1 M) were mixed orderly with continued stirring. Then, the precursor solution became faint yellow. After the magnetically stir for 30 min, 5 mL glucose aqueous solution (1 M) was added. Then, the mixed solution was poured into the Teflon-lined stainless-steel autoclaves (45 mL), and put into an oven for hydrothermal reaction under 180 °C for 20 h. The resultant sedimentation which changed into black color was collected, washed, and dried. Finally, the precursor Fe<sub>2</sub>PO<sub>5</sub>/polymeric layer octahedrons were then transferred into graphite boat and calcined in tube furnace at 800 °C under H<sub>2</sub> atmosphere for 200 min. (The pure Fe<sub>2</sub>P was prepared through the above methods except the addition of glucose.)

##### Characterization

An X-ray diffractometer with Co K $\alpha$  ( $\lambda=1.78897$  Å) radiation (XRD, Bruker D8 Advance), a field-emission scanning electron microscope (JEOL, JSM-7800F, 15 kV), a transmission electron microscope (Philips, Tecnai, F30, 300 kV) coupled with an energy-dispersive spectrometer (EDS) analyzer, a BET surface-area and pore-size analyzer (Quantachrome Autosorb-6B), and a RENISHAW Invia Raman microscope (voltage (ac) 100–240 V, Power 150 W, UK) were introduced.

##### Electrochemical Measurements

As for HER, electrochemical measurement was fulfilled on a CHI660E

electrochemistry work-station, which was studied in a three-electrode device including a working electrode of clean glassy carbon electrode (GCE) ( $0.07 \text{ cm}^2$ ), a reference electrode of saturated calomel electrode (SCE), and a counter electrode of Pt foil. The catalyst suspension was prepared by following steps, 4 mg of the obtained  $\text{Fe}_2\text{P}/\text{GC}$  yolk/shell octahedrons composite as catalyst, 100  $\mu\text{L}$  of Nafion solution (0.5 wt %) and 300  $\mu\text{L}$  of ethanol were mixed by ultrasonication. Then, 4  $\mu\text{L}$  of the suspension was dropped on the GCE (mass loading  $0.48 \text{ mg cm}^{-2}$ ) and dried at room temperature as working electrode. Linear sweep voltammetry (LSV) was carried out between -0.2 to -0.6 V at a scanning rate of  $50 \text{ mV s}^{-1}$  in 0.5 M  $\text{H}_2\text{SO}_4$  solution. The durability analysis was taken by cyclic voltammetry (CV) scanning from -0.2 to -0.6 V at  $50 \text{ mV s}^{-1}$  for 2000 cycles. The stability estimation was taken by amperometric *i-t* curve for 12 h at an electrostatic overpotential of 89 mV, i.e., the static voltage was 0.37 V ( $0.089+0.281=0.370 \text{ V}$ ). According to the equation  $E(\text{RHE}) = E(\text{SCE}) + 0.281 \text{ V}$ , all the potentials were involved in reversible hydrogen electrode (RHE) in 0.5 M  $\text{H}_2\text{SO}_4$  solution.

As for LIBs test, a mixture consisted of 80 wt % of composite, 10 wt % of carbon black, and 10 wt % of polyvinyl difluoride (PVDF) using 1- methyl-2-pyrrolidinone (NMP) as solvent was stirred overnight, and then spreaded on Cu foils. The Cu foils were then used as working electrode (mass loading  $2.1 \text{ mg cm}^{-2}$ ).  $\text{LiPF}_6$  (1 M) in ethylene carbonate/diethyl carbonate (1/1 in volume) was used as electrolyte. Pure Li foil was used as counter electrode and reference electrode. The cell was assembled in an argon-filled glovebox. A LAND battery program–control test system was applied to record discharge-charge curves, and a CHI660D electrochemistry workstation was utilized to record CV curves ranged of 0.01-3 V and EIS over a frequency from 0.01 Hz to 100 kHz.

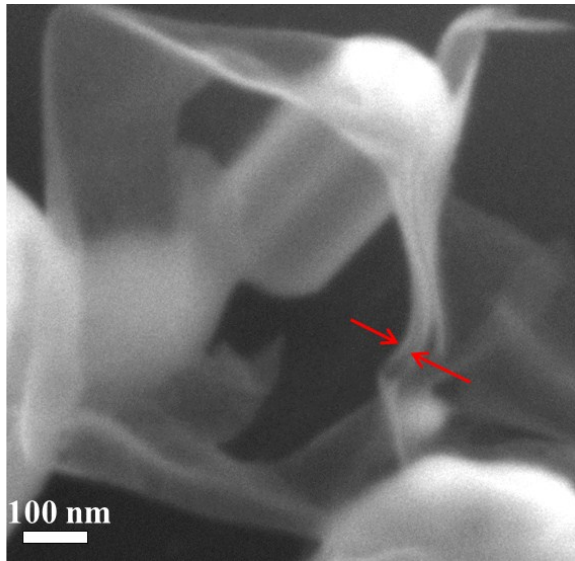

**Figure S1.** SEM image of broken Fe<sub>2</sub>P/GC yolk/shell octahedrons composite.

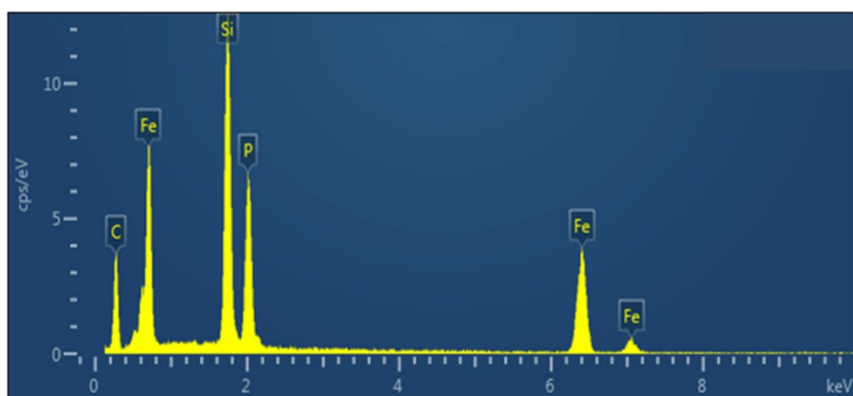

**Figure S2.** Energy-dispersive spectrum (EDS) of  $\text{Fe}_2\text{P}/\text{GC}$  yolk/shell octahedrons composite.

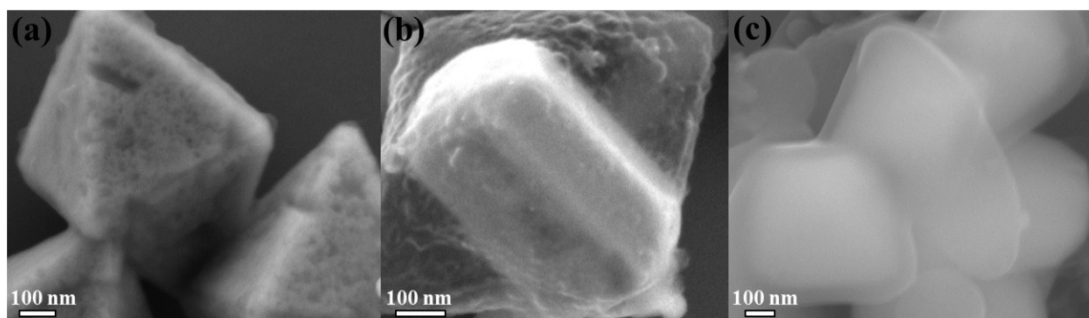

**Figure S3.** SEM images of Fe<sub>2</sub>P/GC calcined at 750 °C (a), 800 °C (b) and 850 °C (c).

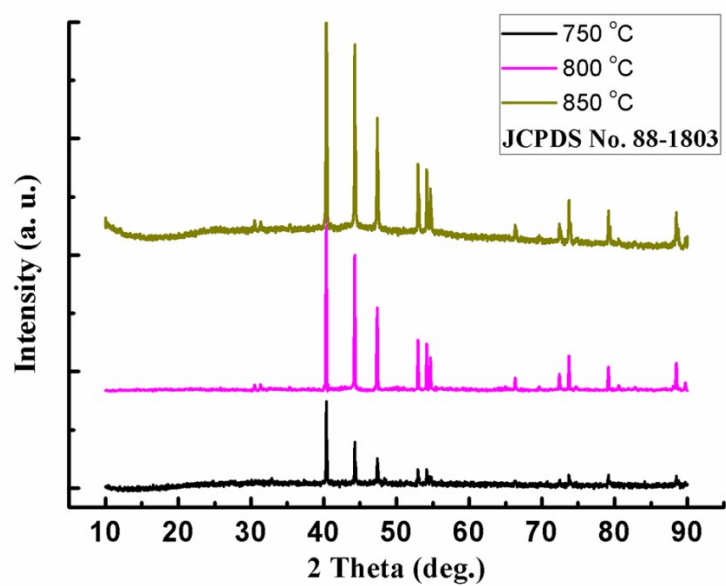

**Figure S4.** XRD pattern of Fe<sub>2</sub>P/GC calcined at 750 °C , 800 °C and 850 °C .

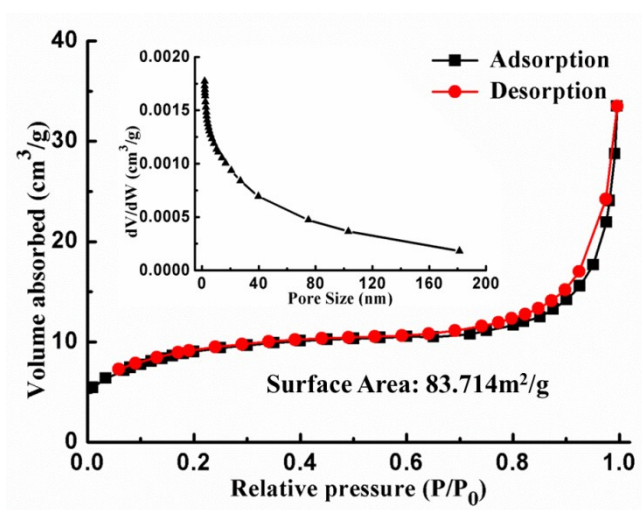

**Figure S5.** N<sub>2</sub> adsorption/desorption curves of solid Fe<sub>2</sub>P/GC octahedrons calcined and 750 °C. The inset exhibits its pore size distribution.

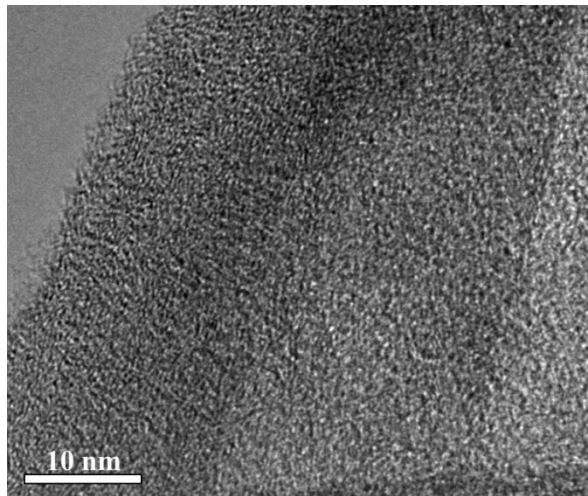

**Figure S6.** HRTEM image of GC shells from final Fe<sub>2</sub>P/GC yolk/shell composite.



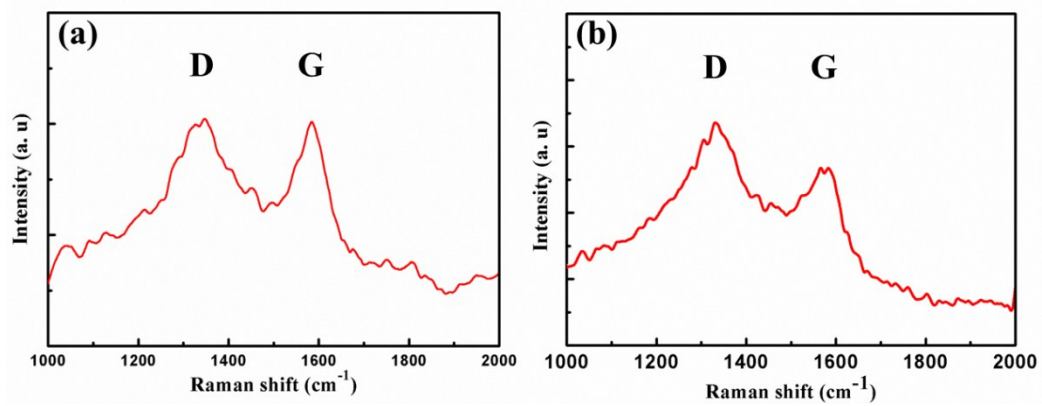

**Figure S7.** Raman spectrum of as-synthesized Fe<sub>2</sub>P/GC yolk/shell octahedrons calcined at 800 °C (a) and solid Fe<sub>2</sub>P/GC composite calcined at 750 °C (b).

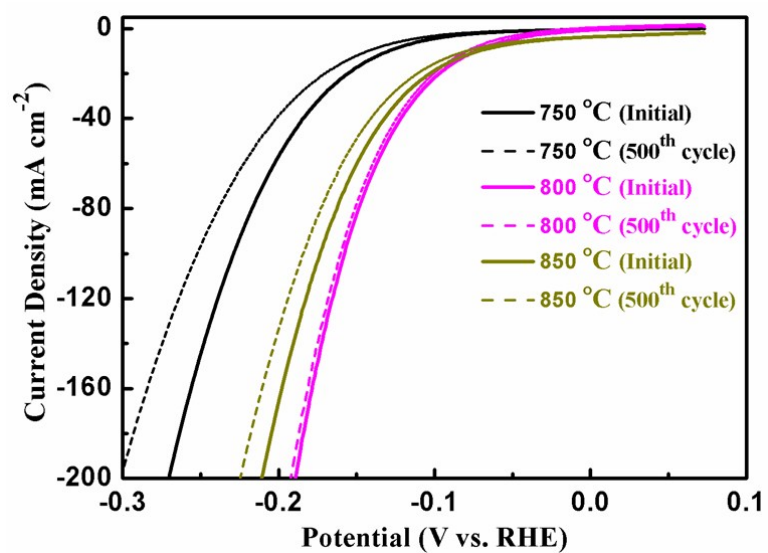

**Figure S8.** LSV curves of Fe<sub>2</sub>P/GC calcinated at 750 °C , 800 °C and 850 °C at 50 mV s<sup>-1</sup> over 500 cycles.

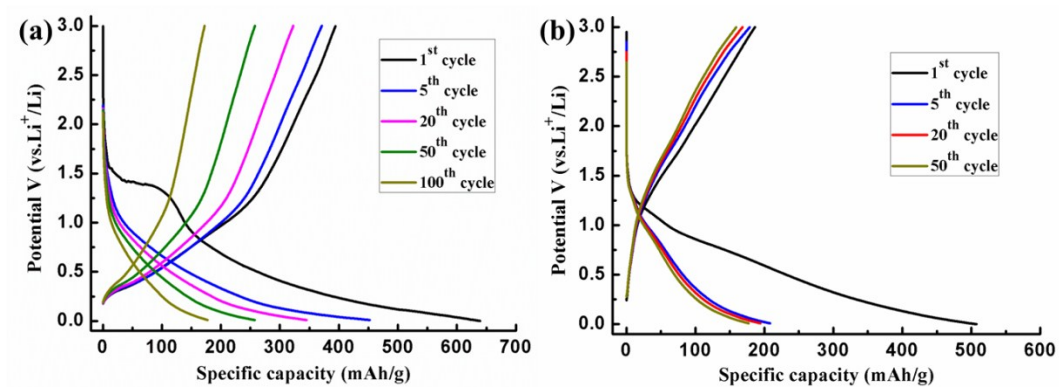

**Figure S9.** Discharge-charge curves of pure Fe<sub>2</sub>P (a) and bare GC after the dissolution of Fe<sub>2</sub>P/GC yolk/shell octahedrons in concentrated hydrochloric acid (b) at the rate of 0.1 A g<sup>-1</sup>.

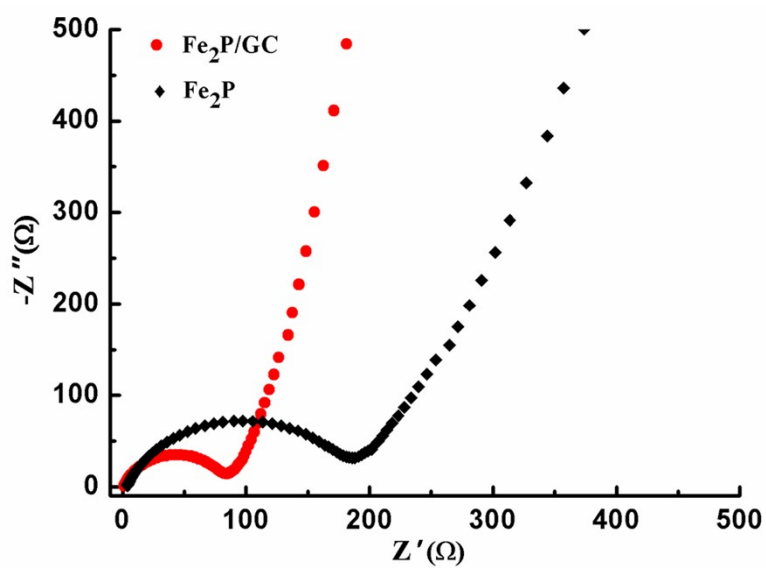

**Figure S10.** Nyquist plots of  $\text{Fe}_2\text{P}/\text{GC}$  yolk/shell octahedrons composite and pure  $\text{Fe}_2\text{P}$  within the frequency range from 0.01 Hz to 100 KHz.

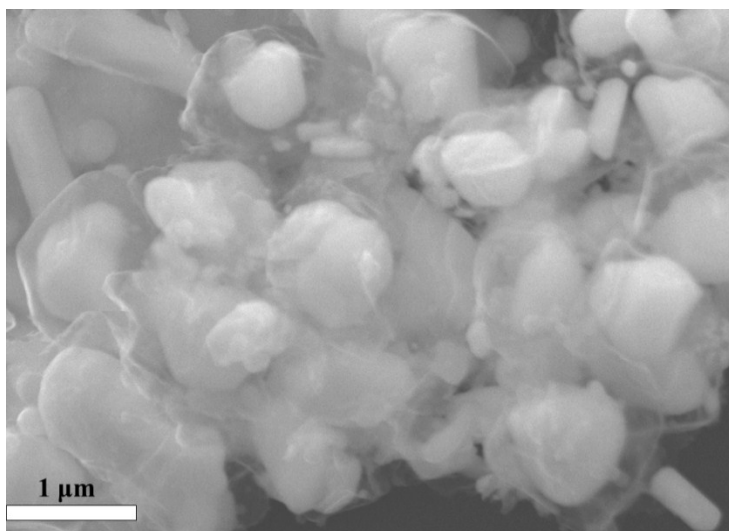

**Figure S11.** SEM image of Fe<sub>2</sub>P/GC yolk/shell composite after electrochemical test.

**Table S1.** N<sub>2</sub> absorption/desorption data of other materials for comparison.

| Materials                                                                       | Specific surface area (SSA)<br>(m <sup>2</sup> g <sup>-1</sup> ) | Pore size<br>(nm) |
|---------------------------------------------------------------------------------|------------------------------------------------------------------|-------------------|
| Cr <sub>2</sub> O <sub>3</sub> @OPC <sup>1</sup>                                | 140                                                              | 20                |
| Co <sub>3</sub> O <sub>4</sub> -HNP/Al <sub>2</sub> O <sub>3</sub> <sup>2</sup> | 207.85                                                           | 4                 |
| np-Mo <sub>2</sub> C NWS <sup>3</sup>                                           | 69.3                                                             | 3.3               |
| Ni <sub>2</sub> P <sup>4</sup>                                                  | 32.8                                                             | -                 |
| C@NiCoP <sup>5</sup>                                                            | 110                                                              | 3.8               |
| CoP NRAs <sup>6</sup>                                                           | 33.3                                                             | -                 |
| Fe <sub>2</sub> P/GCS <sup>7</sup>                                              | 132.2                                                            | 3.9               |
| This work                                                                       | 243.3                                                            | 4.1               |

**Table S2.** Composition of obtained Fe<sub>2</sub>P/GC yolk/shell octahedrons

| Materials                                   | Dissolution by 12 M HCl  |                          | ICP-AES                  |
|---------------------------------------------|--------------------------|--------------------------|--------------------------|
|                                             | Weight ratio             | Molar ratio              | Molar ratio              |
| Fe <sub>2</sub> P/GC yolk/shell octahedrons | Fe:P:C<br>69.1:19.1:11.8 | Fe:P:C<br>1.23:0.61:0.98 | Fe:P:C<br>1.25:0.62:0.96 |

**Table S3.** HER performance of Fe<sub>2</sub>P /GC yolk/shell composite compared with other transition metal compound catalysts.

| Catalyst                            | Electrolyte                          | Onset Overpotential | Tafel Slope (mV dec <sup>-1</sup> ) | $\eta_{10}^a$ (mV) | $\eta_{20}^b$ (mV) |
|-------------------------------------|--------------------------------------|---------------------|-------------------------------------|--------------------|--------------------|
| Mo <sub>2</sub> C/CNT <sup>8</sup>  | 0.5 M H <sub>2</sub> SO <sub>4</sub> | 25                  | 55.2                                | 152                | -                  |
| WC <sup>9</sup>                     |                                      | 15                  | 72                                  | 145                | 189                |
| 1T-MoS <sub>2</sub> <sup>10</sup>   |                                      | -                   | 43                                  | 187                | -                  |
| FeP/NCNT <sup>11</sup>              |                                      | 66                  | 59                                  | 113                | 134                |
| FeP NAs/CC <sup>12</sup>            |                                      | 20                  | 45                                  | 58                 | 79                 |
| CoP/CC <sup>13</sup>                |                                      | 30                  | 30.1                                | 49                 | 59                 |
| Ni <sub>2</sub> P/C <sup>14</sup>   |                                      | 60                  | 54                                  | 87                 | 115                |
| MoP <sup>15</sup>                   |                                      | 50                  | 54                                  | 134                | 162                |
| WP <sup>16</sup>                    |                                      | 41                  | 54                                  | 120                | 140                |
| Fe <sub>2</sub> P/GCS <sup>7</sup>  |                                      | 40                  | 49                                  | 88                 | 107                |
| Fe <sub>2</sub> P/NGr <sup>17</sup> |                                      | 60                  | 65                                  | 138                | 164                |
| This work                           |                                      | 35                  | 45                                  | 76                 | 98                 |

a  $\eta_{10}$ : overpotential requirement for current density of 10 mA cm<sup>-2</sup>.

b  $\eta_{20}$ : overpotential requirement for current density of 20 mA cm<sup>-2</sup>.

## References

1. Y. Gan, Y. Lai, Z. Zhang, W. Chen, K. Du and J. Li, *J. Alloys Compd.*, 2016, 665, 365-372.
2. J. Yang, H. J. Qiu, L. Peng, W. Li and Y. Wang, *Nanoscale*, 2015, 7, 15983-15989.
3. L. Liao, S. Wang, J. Xiao, X. Bian, Y. Zhang, M. D. Scanlon, X. Hu, Y. Tang, B. Liu and H. H. Girault, *Energy Environ. Sci.*, 2014, 7, 387-392.
4. E. J. Popczun, J. R. McKone, C. G. Read, A. J. Biacchi, A. M. Wiltrout, N. S. Lewis and R. E. Schaak, *J. Am. Chem. Soc.*, 2013, 135, 9267-9270.
5. Y. Bai, H. Zhang, L. Liu, H. Xu and Y. Wang, *Chem. Eur. J.*, 2016, 22, 1021-1029.
6. L. Li, X. Li, L. Ai and J. Jiang, *RSC Advances*, 2015, 5, 90265-90271.
7. Y. Zhang, H. Zhang, Y. Feng, L. Liu and Y. Wang, *ACS Appl. Mater. Interfaces*, 2015, 7, 26684-26690.
8. W. F. Chen, C. H. Wang, K. Sasaki, N. Marinkovic, W. Xu, J. T. Muckerman, Y. Zhu and R. R. Adzic, *Energy Environ. Sci.*, 2013, 6, 943-951.
9. X. Fan, H. Zhou and X. Guo, *ACS Nano*, 2015, 9, 5125-5134.
10. M. A. Lukowski, A. S. Daniel, F. Meng, A. Forticaux, L. Li and S. Jin, *J. Am. Chem. Soc.*, 2013, 135, 10274-10277.
11. Q. Liu, Z. Pu, A. M. Asiri and X. Sun, *Electrochim. Acta*, 2014, 149, 324-329.
12. Y. Liang, Q. Liu, A. M. Asiri, X. Sun and Y. Luo, *ACS Catal.*, 2014, 4, 4065-4069.
13. X. Yang, A.-Y. Lu, Y. Zhu, M. N. Hedhili, S. Min, K.-W. Huang, Y. Han and L.-J. Li, *Nano Energy*, 2015, 15, 634-641.
14. Y. J. Bai, H. J. Zhang, X. Li, L. Liu, H. T. Xu, H. J. Qiu and Y. Wang, *Nanoscale*, 2015, 7, 1446-1453.
15. P. Xiao, M. A. Sk, L. Thia, X. Ge, R. J. Lim, J.-Y. Wang, K. H. Lim and X. Wang, *Energy Environ. Sci.*, 2014, 7, 2624-2629.
16. J. M. McEnaney, J. C. Crompton, J. F. Callejas, E. J. Popczun, C. G. Read, N. S. Lewis and R. E. Schaak, *Chem. Commun.*, 2014, 50, 11026-11028.
17. Z. P. Huang, C. C. Lv, Z. Z. Chen, Z. B. Chen, F. Tian and C. Zhang, *Nano Energy*, 2015, 12, 666-674.
